# Supplementary material
Source: publisher figshare collection journal article supplement (https://gsajournals.figshare.com/ndownloader/files/17431223)
Supplement: Supplementary file 1 [file 17431223]

chr	block1.end.pos	block2.start.pos	breakpoint.pos	Selected.420
1	126609	127093	126851	No
1	146734	151617	149176	Yes
1	146734	151617	149176	No
1	154679	159122	156900	No
1	171250	173531	172390	No
1	171924	173531	172728	No
1	172965	173531	173248	No
1	170260	182057	176158	No
1	174816	178456	176636	No
1	174816	179753	177284	No
1	179175	181261	180218	No
1	182057	183623	182840	No
1	183623	207856	195740	No
1	181261	210319	195790	Yes
1	181261	210319	195790	No
1	183623	210319	196971	No
1	173531	266733	220132	No
1	179175	266733	222954	No
1	181261	266846	224054	No
1	207856	266733	237294	No
1	210319	266733	238526	No
1	210319	266846	238582	No
1	267853	269524	268688	No
1	269697	270147	269922	No
1	269697	271416	270556	No
1	269697	271416	270556	No
1	290554	292344	291449	No
1	291602	291993	291798	Yes
1	309787	387895	348841	No
1	387895	432021	409958	Yes
1	432021	439809	435915	No
1	432547	440564	436556	No
1	432547	445271	438909	No
1	440564	445271	442918	No
1	445271	446882	446076	No
1	447125	449560	448342	No
1	452718	453652	453185	No
1	450466	465818	458142	Yes
1	458079	461327	459703	No
1	458079	462849	460464	No
1	458079	464909	461494	No
1	464929	469286	467108	No
1	468404	468846	468625	No
1	468498	468846	468672	No
1	469581	473429	471505	No
1	469337	478208	473772	No
1	468849	485242	477046	No
1	479432	483188	481310	No
1	479432	483188	481310	No
1	485402	489092	487247	No
1	485402	523868	504635	No
1	495171	523868	509520	No
1	495171	560551	527861	Yes
1	495171	568285	531728	No
1	523868	563367	543618	No
1	560551	563546	562048	No
1	562860	563367	563114	No
1	567771	568766	568268	No
1	567819	569173	568496	Yes
1	568371	569173	568772	Yes
1	568371	569241	568806	No
1	569269	571611	570440	No
1	571823	571955	571889	No
1	571284	573099	572192	No
1	574162	574385	574274	No
1	573099	575623	574361	No
1	573659	577323	575491	No
1	577628	579884	578756	No
1	579884	580976	580430	No
1	583717	584719	584218	No
1	584719	584728	584724	No
1	584728	586941	585834	Yes
1	591513	593981	592747	No
1	594166	594446	594306	Yes
1	596554	599372	597963	Yes
1	591513	606437	598975	No
1	606416	606437	606426	No
1	609446	610051	609748	No
1	612952	615607	614280	No
1	612952	615607	614280	No
1	612952	616831	614892	No
1	615954	616831	616392	No
1	615954	618452	617203	No
1	616982	617800	617391	No
1	616831	623047	619939	No
1	623047	630457	626752	No
1	627030	627062	627046	Yes
1	629134	631901	630518	No
1	636788	636917	636852	Yes
1	642802	645371	644086	No
1	650855	653165	652010	No
1	652305	653165	652735	No
1	652305	664319	658312	Yes
1	660944	663182	662063	No
1	664536	664671	664604	No
1	670658	671911	671284	No
1	672669	678224	675446	No
1	675177	678224	676700	No
1	678328	678747	678538	No
1	701732	703327	702530	Yes
1	703514	705223	704368	No
1	708773	709476	709124	Yes
1	730948	732956	731952	No
1	733046	734158	733602	No
1	736041	738655	737348	No
1	747178	747747	747462	No
1	752927	753480	753204	No
1	757164	758573	757868	No
1	760151	764301	762226	No
1	761468	764116	762792	No
1	766776	768161	767468	No
1	769275	769552	769414	No
1	770082	770282	770182	No
1	775234	776241	775738	No
1	780759	783309	782034	Yes
1	783309	783499	783404	No
1	844417	850465	847441	Yes
1	850465	874797	862631	No
1	875041	971198	923120	No
1	875159	971198	923178	No
1	875159	986719	930939	No
1	874806	987432	931119	Yes
1	922673	971198	946936	No
1	922673	993410	958042	No
1	971198	1064221	1017710	No
1	993410	1067878	1030644	No
1	1022802	1064221	1043512	No
1	1064221	1067618	1065920	No
1	1065037	1067618	1066328	No
1	1065037	1067878	1066458	No
1	1068044	1074092	1071068	No
1	1071783	1072172	1071978	No
1	1100093	1100495	1100294	Yes
1	1100495	1103616	1102056	No
1	1104250	1108301	1106276	No
1	1121361	1123532	1122446	No
1	1134230	1134414	1134322	No
1	1135459	1135862	1135660	No
1	1139600	1139612	1139606	No
1	1140796	1141454	1141125	No
1	1142127	1143443	1142785	Yes
1	1143494	1144061	1143778	No
1	1143053	1144622	1143838	No
1	1158591	1158659	1158625	No
1	1162222	1163183	1162702	No
1	1163523	1164142	1163832	Yes
1	1163183	1164914	1164048	No
1	1164142	1166204	1165173	No
1	1172184	1173413	1172798	No
1	1173418	1173716	1173567	No
1	1173716	1177912	1175814	No
1	1173716	1180290	1177003	No
1	1184380	1190703	1187542	No
1	1199647	1201556	1200602	No
1	1201757	1203627	1202692	No
1	1209662	1211865	1210764	No
1	1191118	1231147	1211132	No
1	1217843	1218274	1218058	No
1	1219320	1219574	1219447	No
1	1220150	1220469	1220310	No
1	1227493	1228801	1228147	No
1	1228908	1232579	1230744	No
1	1233096	1234740	1233918	No
1	1228801	1240045	1234423	No
1	1236971	1238041	1237506	No
1	1238377	1238774	1238576	No
1	1238986	1241922	1240454	No
1	1239354	1241922	1240638	No
1	1242550	1282224	1262387	Yes
1	1240323	1423007	1331665	No
1	1243133	1423007	1333070	No
1	1288787	1423007	1355897	No
1	1382716	1423970	1403343	No
1	1424372	1424464	1424418	No
1	1424372	1424464	1424418	No
1	1425648	1425813	1425730	No
1	1429398	1431611	1430504	No
1	1431611	1433784	1432698	No
1	1432741	1433637	1433189	No
1	1432196	1435039	1433618	No
1	1435771	1437868	1436820	No
1	1457976	1459918	1458947	No
1	1466808	1467443	1467126	No
1	1468650	1472223	1470436	No
1	1488822	1495110	1491966	Yes
1	1506001	1506922	1506462	Yes
1	1515063	1515694	1515378	No
1	1517820	1527461	1522640	No
1	1534298	1534321	1534310	No
1	1539269	1539719	1539494	No
1	1539269	1549147	1544208	No
1	1545758	1545817	1545788	No
1	1545525	1547573	1546549	No
1	1547918	1548132	1548025	Yes
1	1549045	1549147	1549096	Yes
1	1549045	1549147	1549096	No
1	1550477	1550495	1550486	Yes
1	1550655	1550920	1550788	Yes
1	1550655	1552210	1551432	No
1	1549147	1553753	1551450	No
1	1552210	1553245	1552728	No
1	1554025	1554140	1554082	No
1	1554140	1554652	1554396	No
1	1554854	1555291	1555072	No
1	1554812	1555698	1555255	No
1	1554854	1557671	1556262	No
1	1561740	1561832	1561786	No
1	1572915	1573156	1573036	No
1	1574655	1575318	1574986	No
1	1575536	1576310	1575923	No
1	1573327	1579670	1576498	No
1	1575785	1580237	1578011	No
1	1593649	1595475	1594562	Yes
1	1603471	1605844	1604658	No
1	1604698	1604831	1604764	No
1	1610844	1610957	1610900	No
1	1613409	1624709	1619059	No
1	1653093	1653737	1653415	Yes
1	1661550	1662147	1661848	No
1	1690910	1697083	1693996	No
1	1709115	1709824	1709470	Yes
1	1709824	1715676	1712750	Yes
1	1725732	1725983	1725858	No
1	1741497	1742280	1741888	No
1	1744246	1744272	1744259	No
1	1778225	1778417	1778321	Yes
1	1788691	1789045	1788868	No
1	1785557	1793153	1789355	No
1	1797339	1799381	1798360	Yes
1	1811231	1814623	1812927	Yes
1	1816413	1819235	1817824	No
1	1819978	1822094	1821036	Yes
1	1824170	1825034	1824602	No
1	1823370	1829146	1826258	No
1	1831818	1840022	1835920	No
1	1835198	1839746	1837472	No
1	1840318	1841889	1841104	No
1	1844290	1844438	1844364	No
1	1872556	1877418	1874987	No
1	1874286	1875813	1875050	No
1	1872162	1882609	1877386	No
1	1877586	1881941	1879764	No
1	1882005	1884105	1883055	No
1	1887393	1888559	1887976	No
1	1887696	1888401	1888048	No
1	1888493	1888559	1888526	No
1	1888559	1889687	1889123	No
1	1892682	1892695	1892688	No
1	1891744	1894298	1893021	No
1	1940056	1940982	1940519	No
1	1941805	1942285	1942045	No
1	1948337	1949188	1948762	Yes
1	1950598	1953448	1952023	No
1	1961062	1962084	1961573	No
1	1997016	1998107	1997562	No
1	2016809	2020111	2018460	No
1	2028689	2035211	2031950	No
1	2035211	2043365	2039288	No
1	2093870	2095893	2094882	No
1	2111479	2114342	2112910	No
1	2139615	2141179	2140397	No
1	2142684	2142764	2142724	No
1	2143472	2143889	2143680	No
1	2146945	2149675	2148310	No
1	2174124	2175444	2174784	No
1	2174124	2175444	2174784	No
1	2200123	2201991	2201057	No
1	2202776	2203217	2202996	No
1	2203217	2204419	2203818	No
1	2213628	2213877	2213752	No
1	2219656	2220240	2219948	No
1	2222985	2229270	2226128	No
1	2231989	2233557	2232773	No
1	2235312	2235436	2235374	No
1	2237321	2238162	2237742	No
1	2236793	2239425	2238109	No
1	2239429	2242353	2240891	Yes
1	2251769	2252275	2252022	No
1	2271749	2274230	2272990	No
1	2276086	2277013	2276550	Yes
1	2277469	2284698	2281084	Yes
1	2284235	2289031	2286633	Yes
1	2289031	2303244	2296138	Yes
1	2304304	2312698	2308501	No
1	2313010	2313323	2313166	No
1	2311440	2316413	2313926	No
1	2326373	2327671	2327022	No
1	2365790	2367720	2366755	Yes
1	2378381	2380853	2379617	No
1	2378854	2380953	2379904	No
1	2389443	2389499	2389471	No
1	2393016	2394790	2393903	No
1	2403506	2404671	2404088	No
1	2403720	2404671	2404196	No
1	2415784	2419176	2417480	No
1	2415952	2419176	2417564	No
1	2439590	2441778	2440684	Yes
1	2441778	2443845	2442812	No
1	2436519	2449140	2442830	No
1	2441778	2452185	2446982	No
1	2474671	2477381	2476026	No
1	2491621	2491908	2491764	Yes
1	2495248	2513630	2504439	No
1	2509048	2514251	2511650	No
1	2516522	2517099	2516810	No
1	2518184	2520128	2519156	No
1	2519452	2519470	2519461	No
1	2520249	2520618	2520434	Yes
1	2521379	2524032	2522706	No
1	2529477	2531374	2530426	No
1	2551150	2557081	2554116	No
1	2564199	2564447	2564323	No
1	2569574	2569788	2569681	No
1	2578169	2584616	2581392	No
1	2610606	2614938	2612772	No
1	2619464	2622605	2621034	No
1	2619464	2624102	2621783	No
1	2625206	2627283	2626244	No
1	2630076	2631084	2630580	No
1	2630806	2631084	2630945	No
1	2631084	2638050	2634567	Yes
1	2642170	2653132	2647651	No
1	2659276	2660232	2659754	No
1	2661111	2661372	2661242	No
1	2661864	2662258	2662061	No
1	2664489	2664691	2664590	Yes
1	2664818	2665466	2665142	No
1	2665295	2672729	2669012	No
1	2676533	2677853	2677193	Yes
1	2694957	2695893	2695425	No
1	2702300	2704286	2703293	No
1	2704436	2704497	2704466	No
1	2726925	2748910	2737918	Yes
1	2750889	2751373	2751131	No
1	2752548	2752562	2752555	No
1	2752721	2753088	2752904	No
1	2753088	2754177	2753632	No
1	2754867	2755307	2755087	No
1	2755307	2755639	2755473	Yes
1	2755688	2759388	2757538	No
1	2755307	2760302	2757804	No
1	2783929	2786642	2785286	No
1	2808268	2809719	2808994	Yes
1	2817314	2817541	2817428	No
1	2818511	2818949	2818730	No
1	2820728	2820735	2820732	Yes
1	2820798	2825828	2823313	No
1	2827042	2827624	2827333	Yes
1	2842887	2843126	2843006	Yes
1	2843972	2844995	2844484	Yes
1	2848821	2849453	2849137	No
1	2848821	2850324	2849572	No
1	2849453	2851196	2850324	No
1	2850324	2850395	2850360	No
1	2851196	2858528	2854862	Yes
1	2872224	2874393	2873308	Yes
1	2884591	2890823	2887707	No
1	2902490	2906789	2904640	No
1	2910424	2928356	2919390	No
1	2954529	2956187	2955358	Yes
1	2977635	2977831	2977733	No
1	2978310	2982267	2980288	No
1	2986826	2986839	2986832	No
1	2988629	2988686	2988658	No
1	3025355	3026189	3025772	No
1	3029800	3031852	3030826	No
1	3088639	3091125	3089882	No
1	3130648	3133081	3131864	Yes
1	3180741	3182859	3181800	Yes
1	3188094	3188242	3188168	Yes
1	3225109	3225130	3225120	No
1	3227162	3256860	3242011	Yes
1	3248333	3248972	3248652	No
1	3250360	3250408	3250384	No
1	3254064	3254495	3254280	No
1	3265996	3266587	3266292	No
1	3313105	3313678	3313392	No
1	3321865	3395748	3358806	No
1	3361324	3376916	3369120	No
1	3414110	3440720	3427415	No
1	3414110	3441906	3428008	No
1	3414110	3451083	3432596	No
1	3442120	3442204	3442162	No
1	3443518	3443575	3443546	No
1	3443087	3445411	3444249	No
1	3443518	3445192	3444355	No
1	3446761	3448507	3447634	No
1	3445239	3451255	3448247	No
1	3454021	3455703	3454862	No
1	3457222	3459439	3458330	No
1	3496638	3499224	3497931	Yes
1	3496638	3499224	3497931	No
1	3504562	3507407	3505984	No
1	3540404	3544650	3542527	No
1	3552659	3553135	3552897	No
1	3552563	3554690	3553626	Yes
1	3551576	3557358	3554467	No
1	3553135	3557962	3555548	No
1	3554155	3557358	3555756	No
1	3558258	3560899	3559578	No
1	3560980	3564166	3562573	No
1	3565198	3565604	3565401	Yes
1	3566053	3567532	3566792	No
1	3571773	3572580	3572176	No
1	3577920	3580185	3579052	No
1	3585703	3594847	3590275	No
1	3587880	3595270	3591575	No
1	3641423	3641927	3641675	No
1	3662671	3665426	3664048	No
1	3665426	3670220	3667823	No
1	3699466	3705260	3702363	Yes
1	3709739	3711161	3710450	No
1	3714642	3714709	3714676	No
1	3716128	3717094	3716611	No
1	3732083	3732289	3732186	No
1	3741003	3742348	3741676	Yes
1	3745446	3746177	3745812	No
1	3746385	3749037	3747711	Yes
1	3747589	3753730	3750660	Yes
1	3751111	3753730	3752420	No
1	3755563	3756977	3756270	No
1	3757600	3759142	3758371	No
1	3758502	3761112	3759807	No
1	3780343	3780390	3780366	No
1	3799911	3800820	3800366	No
1	3804109	3804390	3804250	Yes
1	3831120	3832457	3831788	No
1	3833068	3839037	3836052	No
1	3868878	3870242	3869560	Yes
1	3870807	3874889	3872848	No
1	3877581	3877652	3877616	No
1	3881350	3881520	3881435	No
1	3882964	3886799	3884882	No
1	3882964	3887036	3885000	Yes
1	3883752	3886494	3885123	No
1	3886306	3886494	3886400	No
1	3887340	3887461	3887400	No
1	3889462	3889798	3889630	No
1	3890315	3891639	3890977	No
1	3920284	3925690	3922987	No
1	3922660	3924451	3923556	No
1	3926432	3926892	3926662	No
1	3926949	3927056	3927002	No
1	3927056	3929277	3928166	No
1	3933802	3933893	3933848	No
1	3933893	4028320	3981106	No
1	3938146	4029763	3983954	Yes
1	4027386	4028320	4027853	No
1	4027386	4029763	4028574	No
1	4029763	4030482	4030122	No
1	4030482	4032248	4031365	No
1	4039186	4039526	4039356	No
1	4039526	4041654	4040590	No
1	4041654	4044777	4043216	No
1	4045808	4045873	4045840	No
1	4049678	4049773	4049726	No
1	4055643	4055719	4055681	No
1	4055643	4056734	4056188	No
1	4058922	4058931	4058926	No
1	4061701	4065846	4063774	No
1	4064374	4065249	4064812	No
1	4064374	4066936	4065655	No
1	4065249	4066936	4066092	Yes
1	4065846	4066936	4066391	No
1	4082744	4083110	4082927	Yes
1	4103558	4106972	4105265	No
1	4101753	4109833	4105793	No
1	4113507	4113622	4113564	No
1	4120891	4126364	4123628	No
1	4120891	4127343	4124117	No
1	4126271	4127622	4126946	No
1	4150574	4151132	4150853	No
1	4156821	4156872	4156846	No
1	4161602	4162884	4162243	No
1	4166784	4168020	4167402	No
1	4168549	4169521	4169035	No
1	4188548	4193806	4191177	No
1	4193233	4193399	4193316	No
1	4193422	4193460	4193441	No
1	4200426	4201794	4201110	No
1	4192788	4219051	4205920	Yes
1	4217365	4217855	4217610	No
1	4216764	4218808	4217786	No
1	4217855	4218808	4218332	Yes
1	4220780	4222325	4221552	No
1	4212166	4232884	4222525	No
1	4224369	4224375	4224372	No
1	4224588	4224744	4224666	No
1	4224588	4224744	4224666	No
1	4224588	4229686	4227137	Yes
1	4228664	4229329	4228996	No
1	4233508	4235774	4234641	No
1	4233888	4235774	4234831	No
1	4246803	4249323	4248063	No
1	4249346	4251072	4250209	Yes
1	4251166	4252494	4251830	No
1	4262995	4263173	4263084	No
1	4265571	4265867	4265719	No
1	4271383	4272454	4271918	No
1	4272454	4273537	4272996	No
1	4273662	4275144	4274403	No
1	4275867	4275989	4275928	No
1	4276107	4278271	4277189	No
1	4277294	4277805	4277550	Yes
1	4277492	4277687	4277590	No
1	4277492	4277687	4277590	No
1	4282600	4290013	4286306	No
1	4286001	4290559	4288280	No
1	4286216	4290436	4288326	No
1	4290013	4290873	4290443	No
1	4291206	4292611	4291908	No
1	4291206	4293233	4292220	No
1	4292046	4292971	4292508	No
1	4337681	4339842	4338762	No
1	4341581	4342389	4341985	Yes
1	4366381	4368321	4367351	No
1	4371291	4371658	4371474	Yes
1	4372649	4375932	4374290	No
1	4374375	4375595	4374985	No
1	4378926	4379353	4379140	No
1	4382479	4382950	4382714	No
1	4387324	4388565	4387944	No
1	4402197	4404164	4403180	No
1	4420046	4421404	4420725	No
1	4427274	4427458	4427366	No
1	4426891	4429645	4428268	No
1	4455715	4465734	4460724	No
1	4461510	4461750	4461630	No
1	4470862	4471223	4471042	No
1	4472083	4472098	4472090	No
1	4490911	4491124	4491018	No
1	4496160	4505607	4500884	No
1	4503968	4508136	4506052	No
1	4512907	4513209	4513058	No
1	4511176	4515931	4513554	No
1	4519283	4519876	4519580	No
1	4524579	4529000	4526790	No
1	4529181	4530451	4529816	Yes
1	4538187	4538573	4538380	No
1	4541927	4542102	4542014	No
1	4541927	4542344	4542136	No
1	4542930	4543015	4542972	No
1	4542122	4545220	4543671	No
1	4546899	4547264	4547082	No
1	4546221	4550280	4548250	No
1	4552519	4553484	4553002	No
1	4551898	4556238	4554068	No
1	4581069	4581902	4581486	No
1	4585045	4585064	4585054	No
1	4595803	4597135	4596469	No
1	4598559	4601203	4599881	No
1	4607714	4608860	4608287	No
1	4648432	4650334	4649383	Yes
1	4649385	4650334	4649860	No
1	4650523	4652413	4651468	No
1	4650732	4652413	4651572	No
1	4652413	4654541	4653477	No
1	4658479	4684679	4671579	No
1	4694570	4740751	4717660	Yes
1	4694570	4741972	4718271	No
1	4747265	4747651	4747458	No
1	4754238	4756914	4755576	No
1	4768824	4770921	4769872	No
1	4770424	4770552	4770488	No
1	4770685	4770759	4770722	No
1	4770994	4771314	4771154	No
1	4774757	4776218	4775488	No
1	4780252	4780293	4780272	No
1	4780691	4780717	4780704	Yes
1	4786988	4787486	4787237	Yes
1	4787486	4788491	4787988	No
1	4790713	4793650	4792182	No
1	4809241	4810568	4809904	No
1	4816727	4816814	4816770	No
1	4831953	4835546	4833750	No
1	4842391	4848779	4845585	No
1	4859205	4864935	4862070	No
1	4871877	4872272	4872074	No
1	4873250	4873347	4873298	No
1	4872272	4876547	4874410	No
1	4873347	4876094	4874720	No
1	4873347	4877062	4875204	No
1	4878115	4878682	4878398	No
1	4883840	4884934	4884387	No
1	4889209	4892929	4891069	No
1	4892791	4892929	4892860	No
1	4896744	4900870	4898807	No
1	4899961	4900870	4900416	Yes
1	4901255	4909526	4905390	No
1	4902802	4909773	4906288	No
1	4906997	4908188	4907592	No
1	4925172	4925773	4925472	No
1	4928180	4929328	4928754	No
1	4938066	4941269	4939668	No
1	4942354	4942466	4942410	Yes
1	4942354	4942466	4942410	No
1	4943754	4946045	4944900	No
1	4949251	4953738	4951494	No
1	4995053	4996272	4995662	No
1	4997758	4998159	4997958	No
1	5061896	5070376	5066136	No
1	5035603	5116659	5076131	No
1	5102077	5116659	5109368	No
1	5127398	5130149	5128774	No
1	5130946	5131093	5131020	No
1	5130373	5131666	5131020	No
1	5133626	5133693	5133660	No
1	5134802	5136311	5135556	No
1	5136863	5136927	5136895	No
1	5137116	5137290	5137203	No
1	5168273	5170703	5169488	Yes
1	5190099	5190554	5190326	No
1	5193323	5194740	5194032	No
1	5196666	5197555	5197110	No
1	5204615	5204684	5204650	No
1	5219293	5222391	5220842	No
1	5287931	5289014	5288472	Yes
1	5325747	5327650	5326698	No
1	5338587	5344153	5341370	No
1	5344153	5349766	5346960	No
1	5360032	5361770	5360901	No
1	5370084	5370925	5370504	No
1	5379460	5379713	5379586	No
1	5383991	5386329	5385160	Yes
1	5385117	5389222	5387170	No
1	5389951	5390488	5390220	No
1	5389951	5397074	5393512	No
1	5389274	5398374	5393824	No
1	5394665	5397198	5395932	No
1	5397090	5397198	5397144	No
1	5397915	5398007	5397961	Yes
1	5399032	5404213	5401622	No
1	5421514	5422254	5421884	No
1	5422500	5422507	5422504	No
1	5423195	5423997	5423596	No
1	5424105	5424153	5424129	Yes
1	5425507	5426822	5426164	No
1	5441222	5445614	5443418	No
1	5472311	5473133	5472722	No
1	5506421	5506545	5506483	Yes
1	5508253	5508718	5508486	Yes
1	5522235	5523865	5523050	No
1	5564696	5566444	5565570	No
1	5575170	5579011	5577090	No
1	5610283	5611106	5610694	No
1	5626281	5626425	5626353	No
1	5626425	5647088	5636756	No
1	5640774	5641450	5641112	Yes
1	5639760	5642685	5641222	No
1	5642267	5642404	5642336	Yes
1	5646799	5651817	5649308	Yes
1	5696503	5716534	5706518	No
1	5717342	5724627	5720984	No
1	5742739	5743853	5743296	Yes
1	5786383	5789314	5787848	No
1	5784942	5790915	5787928	No
1	5789314	5790007	5789660	No
1	5812320	5812325	5812322	No
1	5818410	5820915	5819662	No
1	5818410	5820915	5819662	No
1	5828152	5833087	5830620	No
1	5834307	5840961	5837634	No
1	5841966	5842134	5842050	No
1	5840961	5843565	5842263	No
1	5875821	5876177	5875999	Yes
1	5914702	5918198	5916450	No
1	5929970	5962056	5946013	No
1	5956670	5963590	5960130	No
1	5983366	5984817	5984092	No
1	5997888	6001460	5999674	No
1	6017009	6017801	6017405	No
1	6053479	6056864	6055172	No
1	6097465	6099146	6098306	No
1	6098681	6099827	6099254	No
1	6102937	6110680	6106808	No
1	6120426	6121816	6121121	Yes
1	6138646	6138892	6138769	No
1	6166966	6169454	6168210	No
1	6172021	6178532	6175276	No
1	6176913	6178153	6177533	No
1	6182715	6183603	6183159	No
1	6182715	6224081	6203398	No
1	6228911	6233946	6231428	Yes
1	6239731	6243089	6241410	Yes
1	6242203	6243642	6242922	No
1	6246413	6251079	6248746	No
1	6249320	6255739	6252530	No
1	6260567	6260827	6260697	Yes
1	6260567	6260827	6260697	No
1	6267534	6272937	6270236	No
1	6269656	6272720	6271188	No
1	6270318	6272720	6271519	Yes
1	6294028	6295079	6294554	No
1	6298381	6302635	6300508	No
1	6302635	6303033	6302834	No
1	6315038	6318268	6316653	Yes
1	6314555	6319039	6316797	No
1	6318268	6319504	6318886	No
1	6330281	6335637	6332959	Yes
1	6332643	6335637	6334140	No
1	6378061	6384657	6381359	No
1	6392852	6392972	6392912	No
1	6395981	6403472	6399726	Yes
1	6465490	6468628	6467059	Yes
1	6469736	6469787	6469762	Yes
1	6471021	6474055	6472538	Yes
1	6469916	6475464	6472690	No
1	6487522	6488618	6488070	Yes
1	6491119	6491713	6491416	Yes
1	6492774	6492874	6492824	Yes
1	6503011	6504067	6503539	No
1	6504724	6507346	6506035	No
1	6507587	6509612	6508600	Yes
1	6525536	6527703	6526620	No
1	6527488	6527703	6527596	No
1	6527066	6528379	6527722	No
1	6570955	6572749	6571852	No
1	6571591	6574017	6572804	No
1	6577984	6578226	6578105	No
1	6578712	6579101	6578906	No
1	6579125	6580964	6580044	No
1	6581694	6581772	6581733	No
1	6583813	6584216	6584014	No
1	6594560	6595240	6594900	No
1	6615150	6617703	6616426	No
1	6620457	6621317	6620887	No
1	6619970	6622215	6621092	No
1	6621021	6621287	6621154	No
1	6615496	6627522	6621509	No
1	6621021	6622215	6621618	No
1	6622215	6625801	6624008	No
1	6624079	6626143	6625111	No
1	6632320	6635063	6633692	No
1	6635063	6636247	6635655	Yes
1	6636247	6642102	6639174	No
1	6641514	6642102	6641808	No
1	6642322	6642400	6642361	No
1	6643280	6643312	6643296	Yes
1	6643312	6643397	6643354	No
1	6643312	6645395	6644354	No
1	6646374	6646523	6646448	No
1	6649122	6656790	6652956	No
1	6653204	6653770	6653487	No
1	6658639	6664518	6661578	No
1	6673244	6674604	6673924	No
1	6675240	6675933	6675586	No
1	6677919	6679053	6678486	No
1	6679053	6681322	6680188	No
1	6679833	6680660	6680246	Yes
1	6686957	6687433	6687195	Yes
1	6688150	6689713	6688932	No
1	6692053	6693171	6692612	No
1	6722759	6731189	6726974	Yes
1	6734086	6735021	6734554	No
1	6738838	6738976	6738907	Yes
1	6757488	6757688	6757588	No
1	6766019	6766446	6766232	No
1	6774303	6775277	6774790	No
1	6775909	6778253	6777081	No
1	6787049	6787092	6787070	Yes
1	6792212	6792945	6792578	No
1	6811471	6813411	6812441	No
1	6827397	6828192	6827794	No
1	6837533	6837695	6837614	No
1	6841218	6845966	6843592	No
1	6854159	6854581	6854370	Yes
1	6854159	6854581	6854370	No
1	6854581	6855098	6854840	Yes
1	6855098	6855215	6855156	No
1	6860169	6860400	6860284	No
1	6862780	6866720	6864750	No
1	6867502	6868206	6867854	No
1	6868617	6872250	6870434	No
1	6871182	6871474	6871328	No
1	6870447	6872476	6871462	Yes
1	6871474	6872250	6871862	No
1	6871759	6871996	6871878	No
1	6875102	6875633	6875368	No
1	6879810	6882197	6881004	No
1	6882648	6882726	6882687	No
1	6885664	6888525	6887094	No
1	6904858	6906116	6905487	Yes
1	6904935	6906116	6905526	No
1	6910660	6913079	6911870	No
1	6919637	6921738	6920688	No
1	6921738	6928974	6925356	No
1	6938916	6939247	6939082	No
1	6928195	6952126	6940160	No
1	6939393	6940999	6940196	Yes
1	6945452	6948832	6947142	No
1	6960579	6962410	6961494	No
1	6960579	6964018	6962298	No
1	6960579	6966310	6963444	No
1	6964018	6964207	6964112	No
1	6985496	6987001	6986248	No
1	6987001	6987043	6987022	No
1	7004682	7004739	7004710	Yes
1	7012548	7012908	7012728	Yes
1	7019271	7020492	7019882	Yes
1	7023025	7028215	7025620	No
1	7020492	7031525	7026008	No
1	7028435	7028456	7028446	Yes
1	7028958	7029010	7028984	No
1	7029099	7029185	7029142	No
1	7040667	7041074	7040870	No
1	7041339	7045933	7043636	No
1	7045933	7046633	7046283	No
1	7049315	7049903	7049609	No
1	7057016	7060699	7058858	No
1	7078484	7080921	7079702	No
1	7080921	7084243	7082582	No
1	7084893	7088943	7086918	No
1	7090193	7090396	7090294	No
1	7089894	7091829	7090862	No
1	7084389	7103872	7094130	No
1	7095317	7096529	7095923	No
1	7101999	7102491	7102245	No
1	7110654	7112430	7111542	Yes
1	7110654	7113942	7112298	No
1	7112430	7112534	7112482	No
1	7138444	7139369	7138906	No
1	7142583	7145362	7143972	No
1	7145362	7146782	7146072	Yes
1	7152769	7152853	7152811	No
1	7195448	7196105	7195776	No
1	7221183	7231333	7226258	Yes
1	7228466	7228752	7228609	No
1	7229676	7234205	7231940	No
1	7235283	7237396	7236340	Yes
1	7240644	7243177	7241910	No
1	7241409	7247423	7244416	No
1	7249231	7251711	7250471	No
1	7259222	7259398	7259310	No
1	7308149	7311159	7309654	No
1	7316944	7317557	7317250	No
1	7345556	7347478	7346517	No
1	7368293	7370870	7369582	No
1	7368226	7374339	7371282	No
1	7382314	7382441	7382378	No
1	7381896	7383357	7382626	Yes
1	7385489	7386930	7386210	No
1	7387535	7387719	7387627	Yes
1	7401766	7401871	7401818	No
1	7405712	7406056	7405884	Yes
1	7431129	7431143	7431136	No
1	7431427	7431890	7431658	No
1	7438778	7438892	7438835	No
1	7443207	7443983	7443595	No
1	7439508	7457078	7448293	No
1	7455356	7455378	7455367	No
1	7456289	7456543	7456416	No
1	7471097	7471311	7471204	No
1	7472424	7473127	7472776	No
1	7473127	7481951	7477539	No
1	7475581	7479777	7477679	No
1	7477384	7478460	7477922	Yes
1	7478460	7480006	7479233	No
1	7480006	7481472	7480739	No
1	7479461	7482985	7481223	No
1	7500412	7502340	7501376	No
1	7500721	7503589	7502155	Yes
1	7505194	7505312	7505253	No
1	7505357	7505435	7505396	No
1	7509000	7510095	7509548	No
1	7533683	7538936	7536310	No
1	7545676	7550110	7547893	No
1	7550656	7551686	7551171	No
1	7603949	7605261	7604605	No
1	7635089	7635253	7635171	No
1	7638527	7640441	7639484	Yes
1	7639278	7640441	7639860	No
1	7650142	7650153	7650148	No
1	7654418	7659914	7657166	Yes
1	7660913	7664302	7662608	No
1	7664552	7664868	7664710	No
1	7667459	7670142	7668800	No
1	7670142	7670178	7670160	Yes
1	7670178	7670315	7670246	No
1	7692513	7693014	7692764	No
1	7693649	7694771	7694210	Yes
1	7693392	7698075	7695734	No
1	7696804	7701127	7698966	No
1	7699074	7702355	7700714	No
1	7701147	7702355	7701751	Yes
1	7700049	7705248	7702648	No
1	7705288	7705402	7705345	No
1	7705474	7705717	7705596	No
1	7706651	7708394	7707522	No
1	7707174	7708394	7707784	No
1	7709155	7709688	7709422	Yes
1	7712271	7712464	7712368	No
1	7712464	7724349	7718406	Yes
1	7711695	7726815	7719255	Yes
1	7723248	7723697	7723472	No
1	7729967	7731398	7730682	No
1	7731429	7731649	7731539	No
1	7731818	7733074	7732446	No
1	7731955	7733074	7732514	No
1	7731955	7733074	7732514	No
1	7733074	7733272	7733173	No
1	7736750	7741021	7738886	No
1	7744141	7748095	7746118	No
1	7746943	7748095	7747519	Yes
1	7749708	7749739	7749724	No
1	7751846	7753446	7752646	No
1	7751997	7753446	7752722	No
1	7756594	7763014	7759804	No
1	7758299	7763014	7760656	No
1	7766721	7770197	7768459	No
1	7780266	7781619	7780942	No
1	7777957	7784844	7781400	No
1	7782954	7783587	7783270	No
1	7782954	7783833	7783394	No
1	7783640	7784844	7784242	Yes
1	7784867	7785106	7784986	No
1	7784844	7786459	7785652	No
1	7785106	7786459	7785782	Yes
1	7786498	7786524	7786511	No
1	7788920	7789705	7789312	No
1	7790211	7790287	7790249	No
1	7791137	7791443	7791290	No
1	7793158	7794184	7793671	Yes
1	7797105	7801720	7799412	No
1	7801578	7801720	7801649	Yes
1	7803075	7809305	7806190	No
1	7804467	7808727	7806597	No
1	7805131	7827448	7816290	Yes
1	7815348	7817833	7816590	No
1	7816032	7819562	7817797	No
1	7819181	7821011	7820096	No
1	7821704	7822135	7821920	No
1	7822135	7825633	7823884	No
1	7825938	7826242	7826090	No
1	7834128	7835077	7834602	No
1	7835084	7835179	7835132	No
1	7839205	7842859	7841032	No
1	7840312	7841768	7841040	No
1	7843632	7844626	7844129	No
1	7843632	7845062	7844347	No
1	7836273	7859898	7848086	No
1	7851349	7851562	7851456	No
1	7851765	7851776	7851770	No
1	7853404	7853488	7853446	No
1	7853781	7859081	7856431	No
1	7856718	7858031	7857374	Yes
1	7859606	7859898	7859752	No
1	7883597	7884251	7883924	No
1	7884311	7885250	7884780	No
1	7888901	7890217	7889559	Yes
1	7892149	7898065	7895107	No
1	7906505	7907931	7907218	No
1	7906505	7910064	7908284	Yes
1	7907931	7909647	7908789	No
1	7912076	7914963	7913520	No
1	7915582	7916602	7916092	No
1	7920623	7923672	7922148	No
1	7923672	7925420	7924546	No
1	7925420	7932356	7928888	Yes
1	7929066	7932129	7930598	No
1	7941646	7942043	7941844	No
1	7939780	7944496	7942138	Yes
1	7954049	7954405	7954227	No
1	7954809	7955884	7955346	No
1	7963417	7963811	7963614	No
1	7963958	7963983	7963970	Yes
1	7985900	7986903	7986402	No
1	7987932	7989457	7988694	No
1	7997785	8004390	8001088	No
1	8004169	8004390	8004280	Yes
1	8004558	8008269	8006414	No
1	8006233	8008269	8007251	No
1	8006233	8009021	8007627	No
1	8005912	8009781	8007846	Yes
1	8009431	8009781	8009606	No
1	8009431	8010112	8009772	No
1	8010919	8011484	8011202	No
1	8012172	8013460	8012816	No
1	8017064	8018040	8017552	No
1	8025114	8025591	8025352	No
1	8025591	8030649	8028120	No
1	8030649	8031692	8031170	No
1	8031695	8033112	8032404	No
1	8033948	8035650	8034799	No
1	8036593	8037613	8037103	No
1	8042212	8042781	8042496	No
1	8044821	8050375	8047598	Yes
1	8055607	8055715	8055661	No
1	8057906	8059209	8058558	No
1	8059043	8059683	8059363	Yes
1	8073050	8073074	8073062	Yes
1	8074030	8075958	8074994	No
1	8075699	8080738	8078218	No
1	8102127	8104447	8103287	No
1	8104249	8105594	8104922	No
1	8105760	8106156	8105958	No
1	8111238	8111471	8111354	Yes
1	8113383	8114032	8113708	No
1	8114052	8114259	8114156	No
1	8134618	8137078	8135848	Yes
1	8136337	8136485	8136411	Yes
1	8139515	8141018	8140266	No
1	8140286	8143565	8141926	No
1	8144187	8144814	8144500	No
1	8147129	8147527	8147328	No
1	8147771	8148803	8148287	No
1	8149767	8150129	8149948	No
1	8162886	8165812	8164349	No
1	8163990	8164994	8164492	Yes
1	8164994	8168675	8166834	No
1	8166354	8169258	8167806	No
1	8172229	8173193	8172711	Yes
1	8175253	8175446	8175350	Yes
1	8175562	8176327	8175944	No
1	8177205	8178264	8177734	No
1	8177829	8178264	8178046	No
1	8178277	8178740	8178508	Yes
1	8178740	8180027	8179384	No
1	8178740	8180027	8179384	No
1	8178740	8182198	8180469	No
1	8196167	8200962	8198564	No
1	8197675	8199854	8198764	No
1	8201469	8203237	8202353	No
1	8201469	8205635	8203552	Yes
1	8202717	8204386	8203552	No
1	8208035	8208185	8208110	No
1	8273472	8275176	8274324	No
1	8281296	8283342	8282319	Yes
1	8284248	8284888	8284568	No
1	8285920	8286821	8286370	No
1	8285037	8292796	8288916	No
1	8293428	8294020	8293724	No
1	8293428	8294332	8293880	No
1	8294332	8298417	8296374	Yes
1	8296479	8297379	8296929	No
1	8299403	8300196	8299800	Yes
1	8297613	8305131	8301372	No
1	8305165	8308668	8306916	No
1	8307685	8308186	8307936	No
1	8317815	8318921	8318368	No
1	8336833	8337122	8336978	No
1	8339990	8340499	8340244	Yes
1	8340841	8341205	8341023	No
1	8340841	8342139	8341490	Yes
1	8340841	8342139	8341490	No
1	8343175	8343254	8343214	No
1	8344101	8344436	8344268	No
1	8345334	8347702	8346518	No
1	8346456	8347702	8347079	Yes
1	8346456	8348091	8347274	No
1	8350844	8350872	8350858	No
1	8352382	8352519	8352450	No
1	8353180	8354327	8353754	Yes
1	8354852	8355186	8355019	No
1	8355199	8355480	8355340	No
1	8358591	8358831	8358711	No
1	8358391	8362904	8360648	No
1	8372730	8373963	8373346	Yes
1	8375886	8376148	8376017	No
1	8376090	8376407	8376248	No
1	8378415	8378987	8378701	No
1	8390821	8391226	8391024	No
1	8390898	8391226	8391062	No
1	8393960	8394423	8394192	No
1	8393795	8395880	8394838	No
1	8399040	8401476	8400258	No
1	8404397	8431089	8417743	No
1	8448407	8449056	8448732	No
1	8449056	8451300	8450178	No
1	8449056	8451300	8450178	No
1	8451300	8453291	8452296	No
1	8453291	8453387	8453339	Yes
1	8453291	8453387	8453339	No
1	8453291	8453387	8453339	No
1	8452972	8467887	8460430	No
1	8472634	8472977	8472806	No
1	8473821	8473927	8473874	No
1	8481901	8484730	8483316	No
1	8484730	8486579	8485654	No
1	8488067	8516401	8502234	Yes
1	8519518	8520404	8519961	No
1	8525511	8528228	8526870	No
1	8525222	8531111	8528166	No
1	8530038	8530536	8530287	No
1	8530728	8533147	8531938	No
1	8534770	8541908	8538339	No
1	8543856	8544508	8544182	No
1	8544508	8546108	8545308	No
1	8546792	8547011	8546902	Yes
1	8550078	8555359	8552718	No
1	8567744	8572056	8569900	No
1	8573582	8576111	8574846	Yes
1	8577518	8578048	8577783	No
1	8593653	8593711	8593682	No
1	8597124	8598752	8597938	Yes
1	8597651	8599054	8598352	No
1	8607860	8609095	8608478	No
1	8626037	8627693	8626865	No
1	8626037	8630256	8628146	No
1	8639509	8639551	8639530	No
1	8660135	8660854	8660494	No
1	8660939	8660985	8660962	No
1	8671261	8672673	8671967	Yes
1	8679176	8679627	8679402	No
1	8680415	8682274	8681344	No
1	8692331	8692869	8692600	Yes
1	8694668	8694811	8694740	No
1	8713059	8714804	8713932	No
1	8714544	8716267	8715406	No
1	8726931	8727958	8727444	Yes
1	8732075	8757889	8744982	No
1	8732075	8865360	8798718	No
1	8764613	8863024	8813818	No
1	8764613	8863706	8814160	No
1	8872640	8876018	8874329	Yes
1	8874106	8875553	8874830	No
1	8910811	8911082	8910946	No
1	8910712	8915148	8912930	No
1	8914524	8914823	8914674	No
1	8915148	8915789	8915468	No
1	8915148	8920662	8917905	No
1	8918289	8920494	8919392	No
1	8922466	8922800	8922633	No
1	8923284	8925525	8924404	No
1	8923644	8925693	8924668	No
1	8926038	8927325	8926682	No
1	8935171	8935761	8935466	Yes
1	8935765	8936031	8935898	No
1	8939485	8940149	8939817	Yes
1	8940149	8942094	8941122	No
1	8939485	8944324	8941904	No
1	8941903	8942094	8941998	No
1	8941584	8944324	8942954	No
1	8944738	8946305	8945522	No
1	8947867	8950687	8949277	No
1	8955353	8958998	8957176	No
1	8964076	8964684	8964380	No
1	8964684	8970455	8967570	No
1	8972140	8972412	8972276	No
1	8970919	8973918	8972418	Yes
1	8972496	8972918	8972707	No
1	8974855	8975583	8975219	No
1	8974983	8975583	8975283	Yes
1	8974855	8976655	8975755	No
1	8975704	8976103	8975904	Yes
1	8975704	8976103	8975904	No
1	8975704	8986124	8980914	No
1	8976678	8985456	8981067	No
1	8977128	8985456	8981292	No
1	8972918	8991698	8982308	No
1	8985127	8987625	8986376	No
1	8986124	8987059	8986592	Yes
1	8987018	8987059	8987038	No
1	8992204	8997377	8994790	No
1	8999804	8999825	8999814	No
1	9017153	9018349	9017751	No
1	9019615	9021875	9020745	No
1	9027379	9033809	9030594	No
1	9038514	9041034	9039774	No
1	9065267	9074295	9069781	No
1	9077075	9082642	9079858	Yes
1	9092461	9094728	9093594	No
1	9094162	9094728	9094445	No
1	9095470	9098075	9096772	No
1	9095543	9101289	9098416	No
1	9100273	9100415	9100344	No
1	9100415	9100767	9100591	No
1	9101985	9102179	9102082	Yes
1	9102725	9104366	9103546	Yes
1	9111791	9117708	9114750	No
1	9115933	9117257	9116595	No
1	9126595	9129686	9128140	No
1	9128576	9128600	9128588	No
1	9130083	9130404	9130244	No
1	9132266	9133576	9132921	Yes
1	9133190	9133310	9133250	No
1	9133431	9133519	9133475	No
1	9137882	9140919	9139400	No
1	9146756	9152328	9149542	No
1	9154958	9156746	9155852	No
1	9160724	9162691	9161708	No
1	9164916	9166436	9165676	No
1	9173496	9175449	9174472	No
1	9176783	9177412	9177098	Yes
1	9177329	9181319	9179324	No
1	9179774	9180073	9179924	No
1	9184698	9188817	9186758	No
1	9185798	9193208	9189503	No
1	9186221	9193208	9189714	No
1	9190384	9190867	9190626	No
1	9193208	9193409	9193308	No
1	9199834	9202017	9200926	No
1	9198319	9213916	9206118	No
1	9199834	9213916	9206875	Yes
1	9193409	9226241	9209825	No
1	9213916	9226039	9219978	No
1	9227501	9228035	9227768	No
1	9230808	9231267	9231038	No
1	9240814	9246484	9243649	No
1	9243831	9260438	9252134	Yes
1	9253745	9259232	9256488	No
1	9254129	9259172	9256650	No
1	9257334	9259172	9258253	No
1	9260872	9261073	9260972	No
1	9310379	9316007	9313193	No
1	9325424	9327760	9326592	No
1	9327159	9328093	9327626	No
1	9328093	9328446	9328270	No
1	9331592	9331876	9331734	No
1	9349748	9353871	9351810	Yes
1	9352264	9352910	9352587	No
1	9357996	9359097	9358546	No
1	9364128	9365022	9364575	No
1	9366823	9368344	9367584	No
1	9368110	9374232	9371171	No
1	9385573	9386995	9386284	No
1	9391451	9393940	9392696	Yes
1	9410913	9411533	9411223	No
1	9412590	9412696	9412643	No
1	9415431	9416023	9415727	No
1	9438940	9439111	9439026	No
1	9447325	9447766	9447546	No
1	9448168	9453140	9450654	No
1	9453979	9454815	9454397	Yes
1	9448345	9461415	9454880	Yes
1	9453979	9456960	9455470	Yes
1	9456960	9457627	9457294	No
1	9457011	9458197	9457604	No
1	9458722	9458728	9458725	No
1	9458728	9459360	9459044	No
1	9459186	9459985	9459586	No
1	9460802	9461415	9461108	No
1	9464066	9480827	9472446	No
1	9474344	9480827	9477586	Yes
1	9485820	9486668	9486244	No
1	9514414	9516245	9515330	No
1	9524754	9524860	9524807	No
1	9594327	9594727	9594527	Yes
1	9618971	9621497	9620234	No
1	9624186	9633185	9628686	No
1	9651528	9652244	9651886	No
1	9694247	9695372	9694810	No
1	9702056	9703805	9702930	Yes
1	9718458	9719051	9718754	Yes
1	9724130	9725731	9724930	No
1	9739614	9742671	9741142	No
1	9776629	9777788	9777208	No
1	9793428	9800230	9796829	No
1	9797952	9801636	9799794	No
1	9797952	9802443	9800198	Yes
1	9800297	9800561	9800429	No
1	9800852	9801258	9801055	Yes
1	9800852	9801258	9801055	No
1	9800297	9801918	9801108	No
1	9800852	9802374	9801613	No
1	9801636	9801918	9801777	No
1	9802374	9802443	9802408	No
1	9804158	9808773	9806466	No
1	9806073	9807335	9806704	No
1	9811149	9811779	9811464	No
1	9828522	9828545	9828534	No
1	9829848	9830362	9830105	No
1	9833359	9835080	9834220	No
1	9834479	9835290	9834884	No
1	9836023	9836055	9836039	No
1	9836139	9838763	9837451	No
1	9840177	9841565	9840871	Yes
1	9844262	9845670	9844966	Yes
1	9873303	9876819	9875061	No
1	9880805	9881296	9881050	No
1	9881778	9882311	9882044	Yes
1	9882623	9884429	9883526	No
1	9884504	9888445	9886474	No
1	9888610	9889003	9888806	Yes
1	9888445	9893827	9891136	No
1	9889003	9893827	9891415	No
1	9888610	9895755	9892182	No
1	9893827	9896116	9894972	No
1	9896702	9897382	9897042	No
1	9911188	9912342	9911765	No
1	9926518	9929381	9927950	No
1	9928863	9929032	9928948	No
1	9930888	9935052	9932970	No
1	9935542	9937020	9936281	No
1	9937020	9937542	9937281	No
1	9938389	9938631	9938510	No
1	9945641	9945931	9945786	Yes
1	9949390	9949685	9949538	No
1	9951854	9955111	9953482	No
1	9955866	9957465	9956666	No
1	9957201	9957465	9957333	No
1	9967383	9968887	9968135	No
1	9967383	9969150	9968266	No
1	9971645	9974071	9972858	No
1	9974071	9975282	9974676	No
1	9974829	9976025	9975427	No
1	9975089	9976025	9975557	No
1	9977734	9978530	9978132	Yes
1	9984971	9986552	9985762	No
1	9988652	9991058	9989855	No
1	9990730	9991058	9990894	No
1	9991731	9992950	9992340	No
1	9995699	9996822	9996260	Yes
1	9996294	9996391	9996342	No
1	10027139	10027200	10027170	No
1	10026610	10028457	10027534	No
1	10027200	10028767	10027984	No
1	10038693	10042290	10040492	No
1	10043495	10044514	10044004	No
1	10044514	10046856	10045685	No
1	10045281	10046856	10046068	No
1	10050177	10050880	10050528	No
1	10049536	10054196	10051866	Yes
1	10053223	10053836	10053530	No
1	10067841	10068912	10068376	No
1	10075593	10075770	10075682	No
1	10077946	10079052	10078499	No
1	10094340	10096837	10095588	Yes
1	10108773	10112004	10110388	No
1	10112754	10113006	10112880	No
1	10114329	10114485	10114407	No
1	10113346	10116336	10114841	No
1	10116393	10117909	10117151	No
1	10116495	10117909	10117202	No
1	10117909	10123184	10120546	No
1	10121691	10122217	10121954	No
1	10132197	10137769	10134983	No
1	10142093	10144539	10143316	Yes
1	10143911	10148186	10146048	No
1	10150039	10158195	10154117	No
1	10158485	10166508	10162496	No
1	10167256	10167553	10167404	No
1	10168037	10168773	10168405	No
1	10171405	10174902	10173154	No
1	10189051	10189877	10189464	No
1	10196071	10196125	10196098	No
1	10197674	10197699	10197686	Yes
1	10197957	10198496	10198226	No
1	10198317	10200664	10199490	No
1	10203984	10204858	10204421	No
1	10202841	10207201	10205021	Yes
1	10205892	10206372	10206132	No
1	10208094	10211457	10209776	Yes
1	10213537	10213781	10213659	No
1	10213537	10262630	10238084	No
1	10213917	10262630	10238274	No
1	10214347	10262630	10238488	Yes
1	10214544	10263200	10238872	No
1	10214544	10263200	10238872	No
1	10262446	10262456	10262451	No
1	10262456	10262630	10262543	No
1	10268791	10271556	10270174	Yes
1	10271556	10271773	10271664	No
1	10286168	10295819	10290994	No
1	10294921	10297751	10296336	No
1	10297751	10298138	10297944	No
1	10305100	10305484	10305292	Yes
1	10327018	10328511	10327764	No
1	10343549	10344273	10343911	No
1	10345699	10346645	10346172	Yes
1	10355353	10356812	10356082	No
1	10363063	10363697	10363380	No
1	10370261	10370421	10370341	No
1	10373116	10377739	10375428	No
1	10375309	10375692	10375500	No
1	10374128	10379988	10377058	No
1	10378887	10379838	10379362	No
1	10421385	10421645	10421515	No
1	10429791	10430372	10430082	Yes
1	10439340	10439383	10439362	No
1	10442092	10442175	10442134	No
1	10442175	10443918	10443046	No
1	10448456	10448560	10448508	No
1	10467666	10472201	10469934	No
1	10474759	10474924	10474842	No
1	10485634	10487111	10486372	No
1	10487111	10487312	10487212	No
1	10487895	10487984	10487940	No
1	10490831	10490890	10490860	No
1	10490948	10490986	10490967	No
1	10492032	10493691	10492862	No
1	10511988	10512973	10512480	Yes
1	10519732	10520078	10519905	No
1	10528616	10528677	10528646	No
1	10541414	10544756	10543085	No
1	10548715	10549398	10549056	No
1	10548815	10549398	10549106	No
1	10548715	10550106	10549410	No
1	10549398	10549598	10549498	Yes
1	10549398	10549598	10549498	No
1	10550298	10552152	10551225	No
1	10555725	10556242	10555984	No
1	10556837	10557834	10557336	No
1	10570324	10570376	10570350	No
1	10570870	10572372	10571621	No
1	10571372	10574632	10573002	Yes
1	10573066	10576492	10574779	No
1	10580137	10580349	10580243	No
1	10580643	10581091	10580867	No
1	10581520	10582152	10581836	No
1	10580643	10583364	10582004	No
1	10582012	10582668	10582340	No
1	10588082	10589287	10588684	No
1	10600023	10602503	10601263	Yes
1	10606987	10609450	10608218	Yes
1	10611275	10612104	10611690	No
1	10611977	10612104	10612040	No
1	10618147	10618223	10618185	No
1	10618147	10618597	10618372	No
1	10619431	10621738	10620584	No
1	10620148	10621738	10620943	No
1	10620148	10624102	10622125	Yes
1	10622297	10623329	10622813	No
1	10628194	10628318	10628256	No
1	10629888	10631599	10630744	No
1	10635008	10636588	10635798	No
1	10637945	10646017	10641981	Yes
1	10644946	10645526	10645236	No
1	10646128	10652541	10649334	No
1	10652954	10654274	10653614	No
1	10652954	10665961	10659458	No
1	10666182	10667030	10666606	Yes
1	10666359	10668630	10667494	Yes
1	10668630	10681643	10675136	No
1	10677037	10677698	10677368	No
1	10678526	10680313	10679420	No
1	10681643	10684451	10683047	Yes
1	10682685	10684729	10683707	Yes
1	10684364	10684451	10684408	No
1	10701557	10705880	10703718	No
1	10703477	10704607	10704042	No
1	10705744	10705880	10705812	No
1	10708663	10711732	10710198	No
1	10711854	10712485	10712170	Yes
1	10852319	10852899	10852609	No
1	10853177	10864371	10858774	No
1	10867446	10867617	10867532	No
1	10873010	10873534	10873272	No
1	10873542	10873897	10873720	No
1	10877358	10877568	10877463	No
1	10877568	10879465	10878516	No
1	10883474	10888988	10886231	No
1	10890900	10891812	10891356	No
1	10892002	10893258	10892630	No
1	10893258	10895155	10894206	No
1	10893398	10895213	10894306	No
1	10904177	10904441	10904309	Yes
1	10911027	10911378	10911202	Yes
1	10912175	10912579	10912377	No
1	10922311	10926051	10924181	No
1	10933235	10940359	10936797	No
1	10933235	10940875	10937055	Yes
1	10940941	10942562	10941752	No
1	10944048	10957620	10950834	No
1	10951294	10951985	10951640	No
1	10957222	10957533	10957378	No
1	10957222	10957620	10957421	No
1	10962667	10965353	10964010	Yes
1	10965353	10970812	10968082	No
1	10971013	10971569	10971291	No
1	10971569	10971699	10971634	No
1	10971699	10971766	10971732	No
1	10973412	10975015	10974214	Yes
1	10976438	10977083	10976760	No
1	10978328	10978921	10978624	No
1	10998920	10998975	10998948	Yes
1	11004751	11005057	11004904	No
1	11004751	11005489	11005120	No
1	11007413	11007436	11007424	No
1	11010776	11011399	11011088	No
1	11012578	11013980	11013279	No
1	11011874	11019430	11015652	No
1	11023369	11025233	11024301	No
1	11026450	11027120	11026785	No
1	11027313	11027439	11027376	Yes
1	11059936	11061304	11060620	No
1	11067678	11067891	11067784	No
1	11067780	11068668	11068224	Yes
1	11067891	11069098	11068494	No
1	11069475	11069574	11069524	No
1	11071848	11072530	11072189	Yes
1	11074870	11082592	11078731	No
1	11077001	11081998	11079500	No
1	11078757	11080378	11079568	No
1	11082113	11085393	11083753	Yes
1	11085339	11086475	11085907	No
1	11088707	11088711	11088709	No
1	11092356	11094815	11093586	No
1	11100398	11102874	11101636	No
1	11106839	11106866	11106852	No
1	11106750	11107489	11107120	No
1	11108609	11108858	11108734	No
1	11106968	11111497	11109232	No
1	11109404	11111078	11110241	No
1	11109001	11111663	11110332	No
1	11114527	11114640	11114584	No
1	11114527	11116278	11115402	No
1	11114640	11117280	11115960	No
1	11116278	11116482	11116380	No
1	11117564	11117716	11117640	No
1	11117564	11118237	11117900	No
1	11118951	11118955	11118953	No
1	11117564	11120465	11119014	No
1	11118955	11119152	11119054	No
1	11118955	11119152	11119054	No
1	11119152	11120082	11119617	Yes
1	11125817	11126734	11126276	No
1	11140273	11141205	11140739	No
1	11142608	11157526	11150067	No
1	11162249	11162436	11162342	No
1	11172927	11173110	11173018	No
1	11174000	11174085	11174042	No
1	11177448	11183829	11180638	Yes
1	11180679	11183383	11182031	No
1	11184662	11186107	11185384	Yes
1	11185014	11186107	11185560	Yes
1	11186317	11188733	11187525	Yes
1	11188850	11192300	11190575	No
1	11192323	11192454	11192388	No
1	11191794	11194519	11193156	Yes
1	11192988	11194871	11193930	No
1	11196183	11196447	11196315	No
1	11197732	11197889	11197810	Yes
1	11198326	11198381	11198354	No
1	11198101	11199447	11198774	Yes
1	11200960	11201218	11201089	No
1	11203087	11204335	11203711	No
1	11205067	11205400	11205234	No
1	11213377	11213536	11213456	No
1	11214060	11214477	11214268	No
1	11213665	11215275	11214470	No
1	11214477	11214679	11214578	No
1	11214477	11215185	11214831	No
1	11215437	11215819	11215628	Yes
1	11215275	11216496	11215886	Yes
1	11216082	11216647	11216364	No
1	11216242	11216990	11216616	No
1	11219149	11219328	11219238	No
1	11221300	11221469	11221384	No
1	11260220	11261057	11260638	Yes
1	11260394	11262086	11261240	No
1	11262826	11265745	11264286	Yes
1	11276767	11278581	11277674	Yes
1	11277290	11278581	11277936	No
1	11280218	11280920	11280569	No
1	11281978	11282167	11282072	No
1	11282639	11282724	11282682	Yes
1	11318183	11318226	11318204	No
1	11321537	11321672	11321604	No
1	11328519	11328621	11328570	No
1	11321537	11345019	11333278	No
1	11348478	11348827	11348652	Yes
1	11353249	11355246	11354248	No
1	11353249	11356793	11355021	No
1	11371096	11373477	11372286	No
1	11384701	11384985	11384843	Yes
1	11388279	11388686	11388482	No
1	11390960	11391059	11391010	No
1	11410119	11410154	11410136	No
1	11437590	11437730	11437660	No
1	11443642	11443821	11443732	No
1	11444766	11444922	11444844	No
1	11448357	11448801	11448579	No
1	11448357	11448801	11448579	No
1	11450762	11451337	11451050	Yes
1	11451357	11453766	11452562	No
1	11451357	11454060	11452708	Yes
1	11452970	11453045	11453008	No
1	11461711	11461863	11461787	No
1	11463028	11463673	11463350	Yes
1	11463694	11464806	11464250	No
1	11464830	11465350	11465090	No
1	11466186	11466233	11466210	No
1	11467823	11468046	11467934	No
1	11470065	11470610	11470338	No
1	11468137	11472778	11470458	No
1	11471217	11471403	11471310	No
1	11471458	11472354	11471906	No
1	11470065	11474185	11472125	No
1	11471553	11472778	11472166	No
1	11472010	11474185	11473098	No
1	11473053	11473151	11473102	No
1	11473053	11473151	11473102	No
1	11473151	11473418	11473284	No
1	11475424	11475604	11475514	Yes
1	11475424	11475604	11475514	No
1	11527882	11528896	11528389	No
1	11536950	11537742	11537346	No
1	11544341	11545171	11544756	No
1	11546710	11547497	11547104	No
1	11559452	11562373	11560912	No
1	11570067	11571129	11570598	No
1	11571666	11572814	11572240	Yes
1	11574458	11575703	11575080	No
1	11578716	11582103	11580410	No
1	11583034	11583110	11583072	No
1	11590614	11590626	11590620	No
1	11591221	11592225	11591723	No
1	11599144	11599352	11599248	No
1	11599849	11603503	11601676	No
1	11608294	11610967	11609630	Yes
1	11619213	11619368	11619290	No
1	11619618	11620737	11620178	No
1	11619618	11621810	11620714	Yes
1	11621810	11624129	11622970	Yes
1	11622188	11624129	11623158	No
1	11628325	11628794	11628560	No
1	11629198	11630126	11629662	Yes
1	11662358	11665231	11663794	No
1	11665579	11665741	11665660	No
1	11667109	11671670	11669390	No
1	11670614	11671670	11671142	No
1	11670614	11671670	11671142	No
1	11671670	11672024	11671847	No
1	11684666	11686129	11685398	No
1	11682342	11688609	11685476	No
1	11688639	11688748	11688694	Yes
1	11702354	11703350	11702852	Yes
1	11709761	11710392	11710076	No
1	11717340	11718855	11718098	No
1	11724586	11726121	11725354	No
1	11726241	11728987	11727614	No
1	11738765	11742585	11740675	No
1	11752384	11764652	11758518	No
1	11759744	11764652	11762198	No
1	11767845	11770003	11768924	No
1	11769823	11770003	11769913	Yes
1	11770233	11772041	11771137	No
1	11773302	11773345	11773324	No
1	11797312	11797371	11797342	No
1	11794704	11800791	11797748	No
1	11800791	11800950	11800870	No
1	11811940	11812524	11812232	No
1	11816769	11817070	11816920	No
1	11817635	11817726	11817680	No
1	11819706	11821919	11820812	No
1	11818812	11824455	11821634	No
1	11822071	11822267	11822169	Yes
1	11824455	11824869	11824662	No
1	11824748	11825006	11824877	No
1	11825333	11826217	11825775	Yes
1	11826350	11827586	11826968	No
1	11826480	11829589	11828034	No
1	11826258	11832444	11829351	No
1	11829598	11830560	11830079	No
1	11830560	11830599	11830580	No
1	11837720	11843411	11840566	No
1	11852721	11860092	11856406	No
1	11855657	11857542	11856600	No
1	11857673	11858297	11857985	Yes
1	11857673	11859630	11858652	No
1	11860094	11860271	11860182	No
1	11859781	11861269	11860525	No
1	11860271	11861269	11860770	No
1	11861444	11861818	11861631	No
1	11860271	11864161	11862216	No
1	11862415	11863177	11862796	No
1	11902942	11903456	11903199	Yes
1	11903456	11908372	11905914	No
1	11914409	11918247	11916328	No
1	11919858	11925202	11922530	No
1	11918247	11936615	11927431	No
1	11919858	11935580	11927719	No
1	11921283	11937002	11929142	Yes
1	11925202	11935580	11930391	No
1	11929076	11935580	11932328	No
1	11930673	11935580	11933126	No
1	11935714	11936873	11936294	No
1	11936615	11937072	11936844	No
1	11941494	11941693	11941594	No
1	11941693	11942239	11941966	Yes
1	11951021	11951154	11951088	Yes
1	11953050	11953256	11953153	Yes
1	11954862	11955791	11955326	No
1	11960012	11960040	11960026	Yes
1	11961549	11961708	11961628	No
1	11970099	11971670	11970884	No
1	11973174	11974001	11973588	No
1	11983062	12002270	11992666	No
1	12003588	12009474	12006531	No
1	12014976	12018651	12016814	No
1	12040646	12044179	12042412	No
1	12030120	12064757	12047438	No
1	12046480	12061061	12053770	No
1	12061061	12062350	12061706	No
1	12064760	12067712	12066236	No
1	12076857	12079359	12078108	Yes
1	12093742	12094668	12094205	No
1	12131325	12131379	12131352	No
1	12162603	12162686	12162644	Yes
1	12163411	12164711	12164061	No
1	12168228	12172422	12170325	Yes
1	12174250	12174623	12174436	No
1	12177220	12183230	12180225	No
1	12201432	12201841	12201636	No
1	12216430	12218077	12217254	No
1	12217364	12217499	12217432	No
1	12221225	12226613	12223919	No
1	12222621	12226613	12224617	No
1	12227673	12229884	12228778	No
1	12229999	12231099	12230549	No
1	12231103	12231588	12231346	No
1	12238853	12239818	12239336	No
1	12239551	12239818	12239684	No
1	12240051	12240340	12240196	No
1	12248557	12249095	12248826	Yes
1	12254810	12255183	12254996	No
1	12261611	12262938	12262274	No
1	12281492	12281759	12281626	No
1	12295092	12295589	12295340	No
1	12309817	12316537	12313177	Yes
1	12313637	12316537	12315087	No
1	12317209	12317904	12317556	No
1	12321745	12324808	12323276	No
1	12318259	12331435	12324847	No
1	12325569	12331435	12328502	No
1	12330666	12338521	12334594	No
1	12343470	12343651	12343560	No
1	12349501	12349546	12349524	No
1	12349647	12349847	12349747	No
1	12349891	12349926	12349908	No
1	12356043	12357981	12357012	No
1	12370126	12372600	12371363	No
1	12372620	12372708	12372664	No
1	12374011	12374066	12374038	No
1	12375824	12415631	12395728	No
1	12415547	12415729	12415638	No
1	12422312	12424786	12423549	No
1	12431924	12435463	12433694	No
1	12372352	12499021	12435686	Yes
1	12436858	12439468	12438163	No
1	12447013	12447270	12447142	No
1	12446791	12447500	12447146	No
1	12450756	12451999	12451378	No
1	12456919	12456945	12456932	Yes
1	12455859	12462668	12459264	No
1	12463269	12464518	12463894	No
1	12463269	12465597	12464433	No
1	12472587	12472688	12472638	No
1	12472717	12475159	12473938	No
1	12475741	12476249	12475995	Yes
1	12480406	12480660	12480533	No
1	12481302	12482350	12481826	No
1	12480406	12483640	12482023	Yes
1	12482495	12482824	12482660	Yes
1	12479898	12486644	12483271	Yes
1	12482689	12484834	12483762	No
1	12481302	12487658	12484480	No
1	12484867	12486167	12485517	No
1	12486644	12487182	12486913	No
1	12500061	12502037	12501049	No
1	12501846	12503215	12502530	No
1	12507084	12508031	12507558	Yes
1	12514351	12514546	12514448	No
1	12518698	12519561	12519130	Yes
1	12518698	12519672	12519185	No
1	12525234	12525341	12525288	No
1	12528613	12529118	12528866	No
1	12540979	12541589	12541284	No
1	12545942	12546109	12546026	Yes
1	12546694	12547668	12547181	No
1	12546694	12550315	12548504	No
1	12549790	12550315	12550052	No
1	12553676	12555194	12554435	No
1	12559981	12561485	12560733	Yes
1	12564242	12564269	12564256	No
1	12580661	12580986	12580824	Yes
1	12581687	12583906	12582796	No
1	12593546	12597421	12595484	No
1	12605210	12605616	12605413	No
1	12607820	12607954	12607887	No
1	12611991	12612450	12612220	No
1	12612543	12613916	12613230	No
1	12613181	12614203	12613692	No
1	12615139	12615510	12615324	No
1	12620862	12620928	12620895	No
1	12625339	12626861	12626100	No
1	12638884	12639522	12639203	No
1	12639332	12644815	12642074	No
1	12644135	12645082	12644608	No
1	12644815	12645475	12645145	No
1	12646750	12646883	12646816	No
1	12646488	12647754	12647121	No
1	12646883	12649780	12648332	No
1	12646883	12651583	12649233	No
1	12651583	12653112	12652348	No
1	12651834	12653793	12652814	No
1	12655999	12656466	12656232	Yes
1	12661021	12662555	12661788	No
1	12687094	12688764	12687929	No
1	12687956	12689440	12688698	Yes
1	12692123	12692169	12692146	No
1	12692434	12693193	12692814	No
1	12692777	12693193	12692985	No
1	12688884	12697600	12693242	No
1	12693309	12694483	12693896	Yes
1	12692777	12695071	12693924	No
1	12692947	12699104	12696026	No
1	12698013	12700223	12699118	No
1	12698736	12700071	12699404	No
1	12702837	12707772	12705304	No
1	12708448	12710290	12709369	Yes
1	12709790	12709881	12709836	No
1	12709564	12711345	12710454	No
1	12710290	12711128	12710709	No
1	12710290	12711443	12710866	No
1	12711128	12711345	12711236	No
1	12711443	12712613	12712028	No
1	12711885	12712412	12712148	No
1	12711885	12712412	12712148	No
1	12712613	12712783	12712698	No
1	12712613	12728680	12720646	No
1	12734702	12734848	12734775	No
1	12740937	12741051	12740994	Yes
1	12741842	12741925	12741884	No
1	12742017	12742068	12742042	No
1	12742259	12742278	12742268	No
1	12856461	12856561	12856511	No
1	12882332	12882913	12882622	No
1	12890689	12891795	12891242	No
1	12912800	12913001	12912900	No
1	12917309	12918082	12917696	No
1	12929240	12931104	12930172	No
1	12934733	12934773	12934753	No
1	12935814	12936215	12936014	No
1	12935572	12937650	12936611	No
1	12936390	12937650	12937020	Yes
1	12937650	12939010	12938330	No
1	12938673	12939855	12939264	No
1	12942760	12948960	12945860	No
1	12948960	12955570	12952265	No
1	12956029	12956073	12956051	No
1	12966391	12967474	12966932	No
1	12971640	12971762	12971701	No
1	12971762	12972500	12972131	No
1	12972141	12972500	12972320	No
1	12972519	12973147	12972833	No
1	12973967	12974439	12974203	No
1	12974141	12974439	12974290	No
1	12973334	13011122	12992228	No
1	12995386	13001537	12998462	No
1	13006418	13012852	13009635	No
1	13006418	13035737	13021078	No
1	13011122	13035737	13023430	Yes
1	13011122	13035737	13023430	No
1	13014518	13035737	13025128	No
1	13014518	13036062	13025290	No
1	13014518	13036519	13025518	No
1	13037039	13037124	13037082	No
1	13037739	13037841	13037790	No
1	13037739	13038043	13037891	No
1	13038648	13042923	13040786	No
1	13042129	13044011	13043070	No
1	13044011	13045577	13044794	No
1	13045577	13045680	13045628	No
1	13044591	13047214	13045902	No
1	13045577	13046679	13046128	Yes
1	13046679	13047665	13047172	No
1	13046679	13048095	13047387	No
1	13047214	13047665	13047440	No
1	13047214	13048095	13047654	No
1	13047665	13049136	13048400	No
1	13046679	13050649	13048664	No
1	13050241	13050494	13050368	No
1	13050741	13054815	13052778	No
1	13057656	13061762	13059709	Yes
1	13060879	13062494	13061686	No
1	13064973	13068141	13066557	No
1	13068563	13068920	13068742	No
1	13068681	13068920	13068800	Yes
1	13060308	13079346	13069827	No
1	13068920	13073198	13071059	No
1	13074884	13076724	13075804	No
1	13076506	13076724	13076615	No
1	13076724	13077389	13077056	No
1	13077108	13077389	13077248	No
1	13077108	13077389	13077248	No
1	13076724	13078132	13077428	No
1	13077108	13078838	13077973	No
1	13077389	13079117	13078253	No
1	13077108	13079700	13078404	No
1	13077389	13080073	13078731	No
1	13078132	13079617	13078874	No
1	13078132	13079700	13078916	No
1	13077108	13082227	13079668	No
1	13079789	13080227	13080008	No
1	13080079	13080227	13080153	No
1	13079789	13081025	13080407	Yes
1	13082597	13083000	13082798	No
1	13086430	13090826	13088628	No
1	13105846	13108268	13107057	No
1	13112206	13114229	13113218	Yes
1	13114706	13114756	13114731	No
1	13115785	13116134	13115960	No
1	13117153	13117380	13117266	No
1	13122011	13122762	13122386	No
1	13123722	13126490	13125106	No
1	13115397	13140907	13128152	No
1	13141457	13142745	13142101	No
1	13141717	13144548	13143132	No
1	13142529	13144032	13143280	No
1	13142745	13143966	13143356	No
1	13142745	13144368	13143556	No
1	13144032	13144846	13144439	No
1	13144768	13144846	13144807	Yes
1	13144548	13145195	13144872	No
1	13145626	13145640	13145633	No
1	13146997	13147059	13147028	No
1	13147059	13148503	13147781	No
1	13201808	13202441	13202124	No
1	13203429	13225270	13214350	No
1	13226435	13227215	13226825	No
1	13227215	13230866	13229040	No
1	13236415	13238872	13237644	No
1	13252120	13253110	13252615	No
1	13254750	13254785	13254768	Yes
1	13257106	13257240	13257173	Yes
1	13258816	13259013	13258914	No
1	13259280	13259360	13259320	No
1	13259470	13259522	13259496	No
1	13260934	13263623	13262278	No
1	13265063	13265182	13265122	No
1	13273244	13273563	13273404	No
1	13278625	13279150	13278888	No
1	13279246	13280280	13279763	No
1	13280280	13280819	13280550	No
1	13281154	13281248	13281201	No
1	13282279	13282434	13282356	No
1	13287261	13287365	13287313	No
1	13287261	13288460	13287860	No
1	13290507	13290742	13290624	No
1	13311870	13312326	13312098	No
1	13314503	13315450	13314976	No
1	13314503	13315958	13315230	No
1	13317896	13319676	13318786	No
1	13319008	13319019	13319014	No
1	13317588	13320847	13319218	No
1	13319468	13320847	13320158	No
1	13361210	13361425	13361318	No
1	13369905	13369915	13369910	No
1	13403430	13404373	13403902	No
1	13433251	13434838	13434044	No
1	13449786	13451741	13450764	No
1	13451741	13452171	13451956	No
1	13451741	13453334	13452538	Yes
1	13453334	13453481	13453408	No
1	13451741	13467197	13459469	No
1	13453498	13466945	13460222	Yes
1	13467150	13467197	13467174	No
1	13467197	13467589	13467393	No
1	13467692	13467702	13467697	No
1	13467702	13467782	13467742	No
1	13467825	13467898	13467862	No
1	13470544	13474134	13472339	No
1	13470165	13480265	13475215	Yes
1	13576373	13576653	13576513	No
1	13656007	13656971	13656489	No
1	13893628	13894573	13894100	No
1	13897387	13898385	13897886	No
1	13900717	13901199	13900958	No
1	14002869	14002951	14002910	No
1	14158008	14158067	14158038	No
1	14158128	14162467	14160298	No
1	14173018	14174203	14173610	No
1	14176084	14177283	14176684	No
1	14176352	14177418	14176885	No
1	15595929	15596008	15595968	Yes
1	15603136	15603844	15603490	No
1	15602546	15610275	15606410	No
1	15607722	15609428	15608575	Yes
1	15608550	15610055	15609302	Yes
1	15609428	15610163	15609796	No
1	15614271	15614703	15614487	No
1	15626312	15627539	15626926	No
1	15648499	15648910	15648704	No
1	15894467	15895199	15894833	No
1	15895107	15901226	15898166	No
1	15905819	15905996	15905908	No
1	15921991	15922870	15922430	No
1	15924797	15925468	15925132	No
1	15923380	15927552	15925466	No
1	15930589	15931398	15930994	No
1	15944055	15945113	15944584	No
1	15945917	15946051	15945984	No
1	15946273	15946577	15946425	No
1	15946580	15946664	15946622	No
1	16110970	16112184	16111577	No
1	16112260	16112411	16112336	No
1	16113528	16115746	16114637	No
1	16118746	16119481	16119114	Yes
1	16120927	16125092	16123010	No
1	16123226	16123860	16123543	No
1	16123860	16123940	16123900	No
1	16124888	16125154	16125021	No
1	16125274	16125289	16125282	No
1	16125304	16127302	16126303	No
1	16126008	16127228	16126618	No
1	16127302	16127975	16127638	No
1	16127302	16128552	16127927	Yes
1	16125547	16130399	16127973	No
[truncated: 15,078 more rows]
